# Supplementary material for: Antibiotic Resistance of Staphylococci from Bulk-Tank Milk of Sheep Flocks: Prevalence, Patterns, Association with Biofilm Formation, Effects on Milk Quality, and Risk Factors
Source: MDPI journal article supplement (doi:10.3390/biology10101016), 2021-10-09
Supplement: s1 [file s1]

# Antibiotic Resistance of Staphylococci from Bulk-Tank Milk of Sheep Flocks: Prevalence, Patterns, Association with Biofilm-Formation, Effects on Milk Quality, Risk Factors

Daphne T. Lianou, Efthymia Petinaki, Peter J. Cripps, Dimitris A. Gougoulis, Charalambia K. Michael, Katerina Tsilipounidaki, Anargyros Skoulakis, Angeliki I. Katsafadou, Natalia G.C. Vasileiou, Themis Giannoulis, Chrysoula Voidarou, Vasia S. Mavrogianni, Mariangela Caroprese and George C. Fthenakis

**Table S1.** Characterisation of staphylococcal strains recovered from milk samples of ewes classified according to biofilm-formation, by combination of results of culture appearance on Congo Red agar and microplate adhesion method.

|                                      |   | Sum of results of each of three separate testing lots<br>for each strain in the microplate adhesion method <sup>1</sup> |        |        |         |
|--------------------------------------|---|-------------------------------------------------------------------------------------------------------------------------|--------|--------|---------|
|                                      |   | 0                                                                                                                       | 1      | 2      | 3       |
|                                      |   |                                                                                                                         |        |        |         |
| Culture appearance on Congo Red agar | - | non BF <sup>2</sup>                                                                                                     | non BF | non BF | weak BF |
|                                      | ± | non BF                                                                                                                  | non BF | BF     | BF      |
|                                      | + | weak BF                                                                                                                 | BF     | BF     | BF      |

<sup>1</sup> sum ranged from 0 (i.e., in all three testing lots median, of three triplicates, OD was < [0.85 × median OD of the positive control strain]) to 3 (i.e., in all three testing lots median, of three triplicates, OD was ≥ [0.85 × median OD of the positive control strain]) (OD: optical density) [Vasileiou et al 2018]; <sup>2</sup> biofilm-forming.

## Reference

Vasileiou, N.G.C.; Chatzopoulos, D.C.; Gougoulis, D.A.; Sarrou, S.; Katsafadou, A.I.; Spyrou, V.; Mavrogianni, V.S.; Petinaki, E.; Fthenakis, G.C. Slime-producing staphylococci as causal agents of subclinical mastitis in sheep. *Vet. Microbiol.* **2018**, *224*, 93–99

**Table S2.** Details of multivariable models employed for the evaluation of the isolation of resistant staphylococcal isolates from the bulk-tank milk of 325 sheep flocks in Greece.

| Outcome                                                                            | Variables offered to the multivariable models ( <i>n</i> ) | Variables required in the final models                                                                                                                                                                                                                              |
|------------------------------------------------------------------------------------|------------------------------------------------------------|---------------------------------------------------------------------------------------------------------------------------------------------------------------------------------------------------------------------------------------------------------------------|
| Isolation of an oxacillin-resistant staphylococcal isolate from the bulk-tank milk | 7                                                          | (a) routine administration of antimicrobials in newborns, (b) vaccination against mastitis, (c) length of previous animal farming experience of the farmer                                                                                                          |
| Isolation of a resistant staphylococcal isolate from the bulk-tank milk            | 10                                                         | (a) management system applied in the flock, (b) month into the lactation period at sampling, (c) annual frequency of systemic disinfections in the farm, (d) length of previous animal farming experience of the farmer, (e) presence of working staff in the flock |
| Isolation of a multi-resistant staphylococcal isolate from the bulk-tank milk      | 7                                                          | (a) management system applied in the flock, (b) length of previous animal farming experience of the farmer                                                                                                                                                          |

**Table S3.** Frequency of susceptibility / resistance to individual antibiotics <sup>1</sup> of staphylococcal isolates recovered from bulk-tank milk of 325 sheep flocks in Greece

|                         | n  | AMP | AZI | CXI | CIP | CLA | CLI | ERY | FOS | FUS | GEN | MOX | MUP | OXA | PEN | RIF | TEI | TET | TOB | SXT |
|-------------------------|----|-----|-----|-----|-----|-----|-----|-----|-----|-----|-----|-----|-----|-----|-----|-----|-----|-----|-----|-----|
| <i>S. aureus</i>        | 54 | 7   | 0   | 0   | 1   | 0   | 2   | 1   | 0   | 1   | 2   | 0   | 1   | 2   | 7   | 0   | 0   | 6   | 1   | 2   |
| <i>S. simulans</i>      | 35 | 1   | 0   | 0   | 0   | 0   | 0   | 0   | 3   | 0   | 0   | 0   | 0   | 1   | 1   | 0   | 0   | 0   | 0   | 0   |
| <i>S. equorum</i>       | 23 | 15  | 0   | 0   | 0   | 0   | 11  | 14  | 12  | 1   | 0   | 0   | 0   | 1   | 15  | 0   | 0   | 2   | 0   | 0   |
| <i>S. haemolyticus</i>  | 22 | 8   | 0   | 0   | 0   | 0   | 1   | 0   | 2   | 0   | 0   | 0   | 0   | 0   | 8   | 0   | 0   | 3   | 1   | 0   |
| <i>S. chromogenes</i>   | 13 | 3   | 0   | 0   | 0   | 0   | 1   | 1   | 0   | 0   | 0   | 0   | 0   | 0   | 3   | 0   | 0   | 3   | 0   | 0   |
| <i>S. lentus</i>        | 12 | 11  | 0   | 0   | 1   | 0   | 11  | 3   | 1   | 2   | 0   | 1   | 0   | 11  | 11  | 0   | 0   | 1   | 0   | 0   |
| <i>S. lugdunensis</i>   | 11 | 6   | 0   | 0   | 0   | 0   | 1   | 0   | 1   | 0   | 0   | 0   | 0   | 0   | 6   | 0   | 0   | 2   | 0   | 0   |
| <i>S. warneri</i>       | 9  | 3   | 0   | 0   | 0   | 0   | 1   | 0   | 2   | 0   | 0   | 0   | 0   | 0   | 3   | 0   | 0   | 1   | 0   | 0   |
| <i>S. kloosii</i>       | 7  | 5   | 0   | 0   | 0   | 0   | 4   | 0   | 4   | 0   | 0   | 0   | 0   | 4   | 5   | 0   | 0   | 1   | 0   | 0   |
| <i>S. capitis</i>       | 6  | 2   | 0   | 0   | 0   | 0   | 0   | 0   | 3   | 0   | 0   | 0   | 0   | 0   | 2   | 0   | 0   | 1   | 0   | 0   |
| <i>S. intermedius</i>   | 6  | 2   | 0   | 0   | 0   | 0   | 0   | 0   | 0   | 0   | 0   | 0   | 0   | 1   | 2   | 0   | 0   | 1   | 0   | 0   |
| <i>S. cohnii</i>        | 4  | 2   | 0   | 0   | 0   | 0   | 2   | 1   | 0   | 2   | 0   | 0   | 0   | 1   | 2   | 0   | 0   | 1   | 0   | 0   |
| <i>ssp. cohnii</i>      |    |     |     |     |     |     |     |     |     |     |     |     |     |     |     |     |     |     |     |     |
| <i>S. epidermidis</i>   | 4  | 3   | 0   | 0   | 0   | 0   | 0   | 1   | 0   | 0   | 0   | 0   | 0   | 1   | 3   | 0   | 0   | 1   | 0   | 0   |
| <i>S. saprophyticus</i> | 4  | 2   | 0   | 0   | 0   | 0   | 0   | 0   | 2   | 2   | 0   | 0   | 0   | 0   | 2   | 0   | 0   | 2   | 0   | 0   |
| <i>S. xylosus</i>       | 4  | 2   | 0   | 0   | 0   | 0   | 3   | 0   | 0   | 3   | 0   | 0   | 0   | 1   | 2   | 1   | 0   | 0   | 0   | 0   |
| <i>S. auricularis</i>   | 3  | 0   | 0   | 0   | 0   | 0   | 0   | 0   | 2   | 0   | 0   | 0   | 0   | 0   | 0   | 0   | 0   | 1   | 0   | 0   |
| <i>S. cohnii</i>        | 3  | 2   | 0   | 0   | 0   | 0   | 1   | 0   | 0   | 1   | 0   | 0   | 0   | 1   | 2   | 0   | 0   | 0   | 0   | 0   |
| <i>ssp. urealyticum</i> |    |     |     |     |     |     |     |     |     |     |     |     |     |     |     |     |     |     |     |     |
| <i>S. sciuri</i>        | 3  | 1   | 0   | 0   | 0   | 0   | 1   | 0   | 0   | 1   | 0   | 0   | 0   | 1   | 1   | 0   | 0   | 0   | 0   | 0   |
| <i>S. vitulinus</i>     | 3  | 1   | 0   | 0   | 0   | 0   | 1   | 0   | 0   | 1   | 0   | 0   | 0   | 1   | 1   | 0   | 0   | 1   | 0   | 0   |
| <i>S. hominis</i>       | 2  | 0   | 0   | 0   | 0   | 0   | 1   | 0   | 0   | 0   | 0   | 0   | 0   | 0   | 0   | 0   | 0   | 0   | 0   | 0   |
| <i>S. pasteurii</i>     | 2  | 2   | 0   | 0   | 0   | 0   | 0   | 0   | 1   | 0   | 0   | 0   | 0   | 0   | 2   | 0   | 0   | 1   | 0   | 0   |
| <i>S. carnosus</i>      | 2  | 1   | 0   | 0   | 0   | 0   | 0   | 0   | 0   | 0   | 0   | 0   | 0   | 1   | 1   | 0   | 0   | 0   | 0   | 0   |

---

|       |     |    |   |   |   |   |    |    |    |    |   |   |   |    |    |   |   |    |   |   |
|-------|-----|----|---|---|---|---|----|----|----|----|---|---|---|----|----|---|---|----|---|---|
| Total | 232 | 79 | 0 | 0 | 2 | 0 | 41 | 21 | 31 | 14 | 2 | 1 | 1 | 27 | 79 | 1 | 0 | 28 | 2 | 2 |
|-------|-----|----|---|---|---|---|----|----|----|----|---|---|---|----|----|---|---|----|---|---|

---

<sup>1</sup> as established by use of VITEK 2; <sup>2</sup> AMP: ampicillin, AZI: azithromycin, CXI: ceftiofur, CIP: ciprofloxacin, CLA: clarithromycin, CLI: clindamycin, ERY: erythromycin, FOS: fosfomicin, FUS: fusidic acid, GEN: gentamicin, MOX: moxifloxacin, MUP: mupirocin, OXA: oxacillin, PEN: penicillin, RIF: rifampicin, TEI: teicoplanin, TET: tetracycline, TOB: tobramycin, SXT: trimethoprim-sulfamethoxazole.

**Table S4.** Details of associations of antibiotic resistance with biofilm-formation by staphylococcal isolates from the bulk-tank milk of 325 sheep flocks in Greece.

| <b>Antibiotic</b>      | <b>Proportion of biofilm-forming resistant isolates</b> | <b><i>p</i></b> |
|------------------------|---------------------------------------------------------|-----------------|
| All antibiotics        | 77/107 (72.0%)                                          | 0.79            |
| Ampicillin, penicillin | 56/79 (70.9%)                                           | 0.95            |
| Clindamycin            | 33/41 (80.5%)                                           | 0.14            |
| Fosfomycin             | 30/33 (90.9%)                                           | 0.007           |
| Tetracycline           | 21/28 (75.0%)                                           | 0.63            |
| Oxacillin              | 21/27 (77.8%)                                           | 0.42            |
| Erythromycin           | 16/21 (76.2%)                                           | 0.59            |

**Table S5.** Details of associations of milk quality with isolation of resistant or multi-resistant staphylococcal isolates from the bulk-tank milk of 325 sheep flocks in Greece.

| Isolation of resistant staphylococcal isolates from the bulk-tank milk ( <i>n</i> = 99)       | No isolation of resistant staphylococcal isolates from the bulk-tank milk ( <i>n</i> = 226)       | <i>p</i> |
|-----------------------------------------------------------------------------------------------|---------------------------------------------------------------------------------------------------|----------|
| Somatic cell counts (cells mL <sup>-1</sup> )                                                 |                                                                                                   |          |
| 0.527 × 10 <sup>6</sup> (95% CI: 0.461 × 10 <sup>6</sup> - 0.600 × 10 <sup>6</sup> )          | 0.473 × 10 <sup>6</sup> (95% CI: 0.430 × 10 <sup>6</sup> - 0.518 × 10 <sup>6</sup> )              | 0.21     |
| Flocks with increased somatic cell counts (> 1.000 × 10 <sup>6</sup> cells mL <sup>-1</sup> ) |                                                                                                   |          |
| 22/99 (22.2%)                                                                                 | 32/226 (14.2%)                                                                                    | 0.07     |
| Total bacterial counts (cfu mL <sup>-1</sup> )                                                |                                                                                                   |          |
| 499 × 10 <sup>3</sup> (95% CI: 363 × 10 <sup>3</sup> - 692 × 10 <sup>3</sup> )                | 360 × 10 <sup>3</sup> (95% CI: 288 × 10 <sup>3</sup> - 447 × 10 <sup>3</sup> )                    | 0.10     |
| Flocks with increased total bacterial counts (> 1500 × 10 <sup>3</sup> cfu mL <sup>-1</sup> ) |                                                                                                   |          |
| 18/99 (18.2%)                                                                                 | 40/226 (17.7%)                                                                                    | 0.92     |
| Fat (%)                                                                                       |                                                                                                   |          |
| 6.03 ± 0.08                                                                                   | 6.22 ± 0.06                                                                                       | 0.05     |
| Protein (%)                                                                                   |                                                                                                   |          |
| 4.46 ± 0.03                                                                                   | 4.41 ± 0.02                                                                                       | 0.10     |
| Isolation of multi-resistant staphylococcal isolates from the bulk-tank milk ( <i>n</i> = 39) | No isolation of multi-resistant staphylococcal isolates from the bulk-tank milk ( <i>n</i> = 286) | <i>p</i> |
| Somatic cell counts (cells mL <sup>-1</sup> )                                                 |                                                                                                   |          |
| 0.502 × 10 <sup>6</sup> (95% CI: 0.393 × 10 <sup>6</sup> - 0.638 × 10 <sup>6</sup> )          | 0.487 × 10 <sup>6</sup> (95% CI: 0.448 × 10 <sup>6</sup> - 0.529 × 10 <sup>6</sup> )              | 0.93     |
| Flocks with increased somatic cell counts (> 1.000 × 10 <sup>6</sup> cells mL <sup>-1</sup> ) |                                                                                                   |          |
| 8/40 (20.0%)                                                                                  | 46/285 (16.1%)                                                                                    | 0.54     |
| Total bacterial counts (cfu mL <sup>-1</sup> )                                                |                                                                                                   |          |
| 639 × 10 <sup>3</sup> (95% CI: 380 × 10 <sup>3</sup> - 1096 × 10 <sup>3</sup> )               | 373 × 10 <sup>3</sup> (95% CI: 309 × 10 <sup>3</sup> - 447 × 10 <sup>3</sup> )                    | 0.07     |
| Flocks with increased total bacterial counts (> 1500 × 10 <sup>3</sup> cfu mL <sup>-1</sup> ) |                                                                                                   |          |
| 7/40 (17.5%)                                                                                  | 51/285 (17.9%)                                                                                    | 0.95     |
| Fat (%)                                                                                       |                                                                                                   |          |
| 5.99 ± 0.14                                                                                   | 6.19 ± 0.05                                                                                       | 0.16     |
| Protein (%)                                                                                   |                                                                                                   |          |
| 4.48 ± 0.05                                                                                   | 4.42 ± 0.01                                                                                       | 0.17     |

**Table S6.** Results of univariable analysis for association with isolation of oxacillin-resistant staphylococcal isolates from the bulk-tank milk of 325 sheep flocks in Greece.

| Isolation of oxacillin-resistant staphylococcal isolates from the bulk-tank milk ( <i>n</i> = 26) |                      |                     |                 | No isolation of resistant staphylococcal isolates from the bulk-tank milk ( <i>n</i> = 299) |                       |                       |                  | <i>p</i> |
|---------------------------------------------------------------------------------------------------|----------------------|---------------------|-----------------|---------------------------------------------------------------------------------------------|-----------------------|-----------------------|------------------|----------|
| Management system applied in the flock                                                            |                      |                     |                 |                                                                                             |                       |                       |                  |          |
| Intensive<br>3                                                                                    | Semi-intensive<br>17 | Semi-extensive<br>6 | Extensive<br>0  | Intensive<br>40                                                                             | Semi-intensive<br>134 | Semi-extensive<br>101 | Extensive<br>24  | 0.17     |
| Month into the lactation period at sampling                                                       |                      |                     |                 |                                                                                             |                       |                       |                  |          |
| 0–1st<br>4                                                                                        | 2nd–5th<br>12        | 6th–9th<br>9        | After 9th<br>1  | 0–1st<br>19                                                                                 | 2nd–5th<br>126        | 6th–9th<br>138        | After 9th<br>16  | 0.30     |
| Machine- or hand-milking                                                                          |                      |                     |                 |                                                                                             |                       |                       |                  |          |
| Machine-milking<br>23                                                                             |                      | Hand-milking<br>3   |                 | Machine-milking<br>232                                                                      |                       | Hand-milking<br>67    |                  | 0.19     |
| No. of ewes in the flock                                                                          |                      |                     |                 |                                                                                             |                       |                       |                  |          |
| ≤ 165 ewes<br>4                                                                                   | 166-330 ewes<br>11   | 331-500 ewes<br>8   | > 500 ewes<br>3 | ≤ 165 ewes<br>84                                                                            | 166-330 ewes<br>109   | 331-500 ewes<br>58    | > 500 ewes<br>48 | 0.48     |
| Total milk quantity per ewe obtained during the preceding milking period                          |                      |                     |                 |                                                                                             |                       |                       |                  |          |
| ≤ 200 L<br>11                                                                                     | 201-400 L<br>14      |                     | > 400 L<br>1    | ≤ 200 L<br>163                                                                              | 201-400 L<br>126      |                       | > 400 L<br>10    | 0.49     |
| Average number of lambs born per ewe                                                              |                      |                     |                 |                                                                                             |                       |                       |                  |          |
| ≤ 1.50<br>22                                                                                      |                      | > 1.50<br>4         |                 | ≤ 1.50<br>257                                                                               |                       | > 1.50<br>42          |                  | 0.85     |
| Collaboration with a veterinarian                                                                 |                      |                     |                 |                                                                                             |                       |                       |                  |          |
| Yes<br>23                                                                                         |                      | No<br>3             |                 | Yes<br>254                                                                                  |                       | No<br>45              |                  | 0.63     |
| Total visits made annually by veterinarians to the flock during the preceding season              |                      |                     |                 |                                                                                             |                       |                       |                  |          |
| ≤ 4<br>9                                                                                          | 5 - 7<br>7           |                     | > 7<br>10       | ≤ 4<br>130                                                                                  | 5 - 7<br>79           |                       | > 7<br>90        | 0.61     |
| Clinical mastitis annual incidence risk in the flock                                              |                      |                     |                 |                                                                                             |                       |                       |                  |          |
| ≤ 0.50%<br>2                                                                                      |                      | > 0.50%<br>24       |                 | ≤ 0.50%<br>54                                                                               |                       | > 0.50%<br>245        |                  | 0.18     |
| Age of lamb removal from their dams                                                               |                      |                     |                 |                                                                                             |                       |                       |                  |          |
| < 45 days<br>12                                                                                   | 45–60 days<br>12     |                     | > 60 days<br>2  | < 45 days<br>107                                                                            | 45–60 days<br>158     |                       | > 60 days<br>34  | 0.55     |

|                                                                                               |                  |                |                |                  |                |
|-----------------------------------------------------------------------------------------------|------------------|----------------|----------------|------------------|----------------|
| <b>Daily number of milking sessions</b>                                                       |                  |                |                |                  |                |
| 1                                                                                             | 2                | 3              | 1              | 2                | 3              |
| 0                                                                                             | 19               | 7              | 1              | 245              | 53             |
| <b>Duration of the dry-period</b>                                                             |                  |                |                |                  |                |
| ≤ 2 months                                                                                    | > 2 months       | ≤ 2 months     | > 2 months     |                  |                |
| 10                                                                                            | 16               | 97             | 202            |                  | 0.53           |
| <b>Means of calculating live bodyweight for the administration of pharmaceutical products</b> |                  |                |                |                  |                |
| Weighing                                                                                      | Estimation       | Weighing       | Estimation     |                  |                |
| 5                                                                                             | 21               | 68             | 231            |                  | 0.68           |
| <b>Routine overdosing (compared to dose prescribed) of pharmaceuticals</b>                    |                  |                |                |                  |                |
| Yes                                                                                           | No               | Yes            | No             |                  |                |
| 7                                                                                             | 19               | 54             | 245            |                  | 0.27           |
| <b>Annual frequency of systemic disinfections in the farm</b>                                 |                  |                |                |                  |                |
| 0 – 1 occasion                                                                                | 2 – 10 occasions | > 10 occasions | 0 – 1 occasion | 2 – 10 occasions | > 10 occasions |
| 4                                                                                             | 20               | 2              | 75             | 208              | 16             |
|                                                                                               |                  |                |                |                  | 0.51           |
| <b>Routine administration of antimicrobials in newborns</b>                                   |                  |                |                |                  |                |
| Yes                                                                                           | No               | Yes            | No             |                  |                |
| 3                                                                                             | 23               | 67             | 232            |                  | 0.19           |
| <b>Vaccination against mastitis</b>                                                           |                  |                |                |                  |                |
| Yes                                                                                           | No               | Yes            | No             |                  |                |
| 14                                                                                            | 12               | 112            | 187            |                  | 0.10           |
| <b>Administration of 'dry-ewe' treatment at the end of the lactation period</b>               |                  |                |                |                  |                |
| Yes                                                                                           | No               | Yes            | No             |                  |                |
| 5                                                                                             | 21               | 48             | 251            |                  | 0.67           |
| <b>Use of teat disinfection after milking</b>                                                 |                  |                |                |                  |                |
| Yes                                                                                           | No               | Yes            | No             |                  |                |
| 4                                                                                             | 22               | 48             | 251            |                  | 0.93           |
| <b>Age of the farmer</b>                                                                      |                  |                |                |                  |                |
| Up to 50 years                                                                                | Over 50 years    | Up to 50 years | Over 50 years  |                  |                |
| 16                                                                                            | 10               | 181            | 118            |                  | 0.92           |
| <b>Length of previous animal farming experience of the farmer</b>                             |                  |                |                |                  |                |
| ≤ 5 years                                                                                     | > 5 years        | ≤ 5 years      | > 5 years      |                  |                |
| 11                                                                                            | 15               | 63             | 236            |                  | 0.013          |



| Education of the farmer                        |                    |                                |                    |      |
|------------------------------------------------|--------------------|--------------------------------|--------------------|------|
| Primary, secondary or post-secondary education | Tertiary education | Primary or secondary education | Tertiary education |      |
| 22                                             | 4                  | 260                            | 39                 | 0.74 |
| Farmer by profession                           |                    |                                |                    |      |
| Yes                                            | No                 | Yes                            | No                 |      |
| 23                                             | 3                  | 269                            | 30                 | 0.69 |
| Family tradition in farming                    |                    |                                |                    |      |
| Yes                                            | No                 | Yes                            | No                 |      |
| 22                                             | 4                  | 261                            | 38                 | 0.69 |
| Presence of working staff in the flock         |                    |                                |                    |      |
| Yes                                            | No                 | Yes                            | No                 |      |
| 13                                             | 13                 | 110                            | 189                | 0.18 |

**Table S7.** Results of univariable analysis for association with isolation of staphylococcal isolates resistant to at least one antibiotic from the bulk-tank milk of 325 sheep flocks in Greece.

| Isolation of resistant staphylococcal isolates from the bulk-tank milk ( <i>n</i> = 99) |                      |                      |                  | No isolation of resistant staphylococcal isolates from the bulk-tank milk ( <i>n</i> = 226) |                      |                      |                  | <i>p</i> |
|-----------------------------------------------------------------------------------------|----------------------|----------------------|------------------|---------------------------------------------------------------------------------------------|----------------------|----------------------|------------------|----------|
| Management system applied in the flock                                                  |                      |                      |                  |                                                                                             |                      |                      |                  |          |
| Intensive<br>17                                                                         | Semi-intensive<br>53 | Semi-extensive<br>26 | Extensive<br>3   | Intensive<br>26                                                                             | Semi-intensive<br>98 | Semi-extensive<br>81 | Extensive<br>21  | 0.032    |
| Month into the lactation period at sampling                                             |                      |                      |                  |                                                                                             |                      |                      |                  |          |
| 0–1st<br>13                                                                             | 2nd–5th<br>45        | 6th–9th<br>38        | After 9th<br>3   | 0–1st<br>10                                                                                 | 2nd–5th<br>93        | 6th–9th<br>109       | After 9th<br>14  | 0.015    |
| Machine- or hand-milking                                                                |                      |                      |                  |                                                                                             |                      |                      |                  |          |
| Machine-milking<br>83                                                                   |                      | Hand-milking<br>16   |                  | Machine-milking<br>172                                                                      |                      | Hand-milking<br>54   |                  | 0.12     |
| No. of ewes in the flock                                                                |                      |                      |                  |                                                                                             |                      |                      |                  |          |
| ≤ 165 ewes<br>20                                                                        | 166-330 ewes<br>36   | 331-500 ewes<br>24   | > 500 ewes<br>19 | ≤ 165 ewes<br>68                                                                            | 166-330 ewes<br>84   | 331-500 ewes<br>42   | > 500 ewes<br>32 | 0.28     |
| Total milk quantity per ewe obtained during the preceding milking period                |                      |                      |                  |                                                                                             |                      |                      |                  |          |
| ≤ 200 L<br>49                                                                           | 201-400 L<br>47      |                      | > 400 L<br>3     | ≤ 200 L<br>125                                                                              | 201-400 L<br>93      |                      | > 400 L<br>8     | 0.57     |
| Average number of lambs born per ewe                                                    |                      |                      |                  |                                                                                             |                      |                      |                  |          |
| ≤ 1.50<br>85                                                                            |                      | > 1.50<br>14         |                  | ≤ 1.50<br>195                                                                               |                      | > 1.50<br>31         |                  | 0.92     |
| Collaboration with a veterinarian                                                       |                      |                      |                  |                                                                                             |                      |                      |                  |          |
| Yes<br>82                                                                               |                      | No<br>17             |                  | Yes<br>195                                                                                  |                      | No<br>31             |                  | 0.42     |
| Total visits made annually by veterinarians to the flock during the preceding season    |                      |                      |                  |                                                                                             |                      |                      |                  |          |
| ≤ 4<br>42                                                                               | 5 - 7<br>20          |                      | > 7<br>37        | ≤ 4<br>97                                                                                   | 5 - 7<br>66          |                      | > 7<br>63        | 0.13     |
| Clinical mastitis annual incidence risk in the flock                                    |                      |                      |                  |                                                                                             |                      |                      |                  |          |
| ≤ 0.50%<br>17                                                                           |                      | > 0.50%<br>82        |                  | ≤ 0.50%<br>39                                                                               |                      | > 0.50%<br>187       |                  | 0.73     |
| Age of lamb removal from their dams                                                     |                      |                      |                  |                                                                                             |                      |                      |                  |          |
| < 45 days<br>43                                                                         | 45–60 days<br>43     |                      | > 60 days<br>13  | < 45 days<br>76                                                                             | 45–60 days<br>127    |                      | > 60 days<br>23  | 0.11     |
| Daily number of milking sessions                                                        |                      |                      |                  |                                                                                             |                      |                      |                  |          |
| 1<br>0                                                                                  | 2<br>81              | 3<br>18              | 1<br>1           | 2<br>183                                                                                    | 3<br>42              | 0.80                 |                  |          |

| Duration of the dry-period                                                             |                  |                    |                                |                    |                |
|----------------------------------------------------------------------------------------|------------------|--------------------|--------------------------------|--------------------|----------------|
| ≤ 2 months                                                                             |                  | > 2 months         | ≤ 2 months                     | > 2 months         |                |
| 33                                                                                     |                  | 66                 | 74                             | 152                | 0.92           |
| Means of calculating live bodyweight for the administration of pharmaceutical products |                  |                    |                                |                    |                |
| Weighing                                                                               |                  | Estimation         | Weighing                       | Estimation         |                |
| 15                                                                                     |                  | 84                 | 58                             | 168                | 0.037          |
| Routine overdosing (compared to dose prescribed) of pharmaceuticals                    |                  |                    |                                |                    |                |
| Yes                                                                                    |                  | No                 | Yes                            | No                 |                |
| 18                                                                                     |                  | 81                 | 43                             | 183                | 0.86           |
| Annual frequency of systemic disinfections in the farm                                 |                  |                    |                                |                    |                |
| 0 – 1 occasion                                                                         | 2 – 10 occasions | > 10 occasions     | 0 – 1 occasion                 | 2 – 10 occasions   | > 10 occasions |
| 4                                                                                      | 32               | 3                  | 75                             | 196                | 15             |
|                                                                                        |                  |                    |                                |                    | 0.09           |
| Routine administration of antimicrobials in newborns                                   |                  |                    |                                |                    |                |
| Yes                                                                                    |                  | No                 | Yes                            | No                 |                |
| 20                                                                                     |                  | 79                 | 50                             | 176                | 0.70           |
| Vaccination against mastitis                                                           |                  |                    |                                |                    |                |
| Yes                                                                                    |                  | No                 | Yes                            | No                 |                |
| 39                                                                                     |                  | 60                 | 87                             | 139                | 0.88           |
| Administration of 'dry-ewe' treatment at the end of the lactation period               |                  |                    |                                |                    |                |
| Yes                                                                                    |                  | No                 | Yes                            | No                 |                |
| 20                                                                                     |                  | 79                 | 33                             | 193                | 0.21           |
| Use of teat disinfection after milking                                                 |                  |                    |                                |                    |                |
| Yes                                                                                    |                  | No                 | Yes                            | No                 |                |
| 20                                                                                     |                  | 79                 | 32                             | 194                | 0.17           |
| Age of the farmer                                                                      |                  |                    |                                |                    |                |
| Up to 50 years                                                                         |                  | Over 50 years      | Up to 50 years                 | Over 50 years      |                |
| 61                                                                                     |                  | 38                 | 136                            | 90                 | 0.81           |
| Length of previous animal farming experience of the farmer                             |                  |                    |                                |                    |                |
| ≤ 5 years                                                                              |                  | > 5 years          | ≤ 5 years                      | > 5 years          |                |
| 30                                                                                     |                  | 69                 | 44                             | 182                | 0.032          |
| Education of the farmer                                                                |                  |                    |                                |                    |                |
| Primary, secondary or post-secondary education                                         |                  | Tertiary education | Primary or secondary education | Tertiary education |                |
| 89                                                                                     |                  | 10                 | 193                            | 33                 | 0.27           |

| Farmer by profession                   |    |     |     |       |
|----------------------------------------|----|-----|-----|-------|
| Yes                                    | No | Yes | No  |       |
| 89                                     | 10 | 203 | 23  | 0.98  |
| Family tradition in farming            |    |     |     |       |
| Yes                                    | No | Yes | No  |       |
| 84                                     | 15 | 199 | 27  | 0.43  |
| Presence of working staff in the flock |    |     |     |       |
| Yes                                    | No | Yes | No  |       |
| 48                                     | 51 | 75  | 151 | 0.009 |

**Table S8.** Results of univariable analysis for association with isolation of multi-resistant staphylococcal isolates from the bulk-tank milk of 325 sheep flocks in Greece.

| Isolation of multi-resistant staphylococcal isolates from the bulk-tank milk<br>( <i>n</i> = 40) |                        |                     |                      | No isolation of multi-resistant staphylococcal isolates from the bulk-tank milk<br>( <i>n</i> = 286) |                       |                       |                 | <i>p</i> |
|--------------------------------------------------------------------------------------------------|------------------------|---------------------|----------------------|------------------------------------------------------------------------------------------------------|-----------------------|-----------------------|-----------------|----------|
| Management system applied in the flock                                                           |                        |                     |                      |                                                                                                      |                       |                       |                 |          |
| Intensive<br>9                                                                                   | Semi-intensive<br>23   | Semi-extensive<br>7 | Extensive<br>1       | Intensive<br>34                                                                                      | Semi-intensive<br>128 | Semi-extensive<br>100 | Extensive<br>23 | 0.030    |
| Month into the lactation period at sampling                                                      |                        |                     |                      |                                                                                                      |                       |                       |                 |          |
| 0–1st<br>6                                                                                       | 2nd–5th<br>17          | 6th–9th<br>14       | After 9th<br>3       | 0–1st<br>17                                                                                          | 2nd–5th<br>121        | 6th–9th<br>133        | After 9th<br>14 | 0.14     |
| Machine- or hand-milking                                                                         |                        |                     |                      |                                                                                                      |                       |                       |                 |          |
| Machine-milking<br>35                                                                            |                        | Hand-milking<br>5   |                      | Machine-milking<br>220                                                                               |                       | Hand-milking<br>65    |                 | 0.14     |
| Total visits made annually by veterinarians to the flock during the preceding season             |                        |                     |                      |                                                                                                      |                       |                       |                 |          |
| ≤ 4<br>19                                                                                        | 5 - 7<br>6             | > 7<br>15           | ≤ 4<br>120           | 5 - 7<br>80                                                                                          | > 7<br>85             |                       |                 | 0.21     |
| Age of lamb removal from their dams                                                              |                        |                     |                      |                                                                                                      |                       |                       |                 |          |
| < 45 days<br>22                                                                                  | 45–60 days<br>13       | > 60 days<br>5      | < 45 days<br>97      | 45–60 days<br>157                                                                                    | > 60 days<br>31       |                       |                 | 0.021    |
| Means of calculating live bodyweight for the administration of pharmaceutical products           |                        |                     |                      |                                                                                                      |                       |                       |                 |          |
| Weighing<br>9                                                                                    |                        | Estimation<br>31    |                      | Weighing<br>64                                                                                       |                       | Estimation<br>221     |                 | 0.99     |
| Annual frequency of systemic disinfections in the farm                                           |                        |                     |                      |                                                                                                      |                       |                       |                 |          |
| 0 – 1 occasion<br>18                                                                             | 2 – 10 occasions<br>74 | > 10 occasions<br>8 | 0 – 1 occasion<br>61 | 2 – 10 occasions<br>154                                                                              | > 10 occasions<br>10  |                       |                 | 0.12     |
| Use of teat disinfection after milking                                                           |                        |                     |                      |                                                                                                      |                       |                       |                 |          |
| Yes<br>11                                                                                        |                        | No<br>29            |                      | Yes<br>41                                                                                            |                       | No<br>244             |                 | 0.034    |
| Length of previous animal farming experience of the farmer                                       |                        |                     |                      |                                                                                                      |                       |                       |                 |          |
| ≤ 5 years<br>15                                                                                  |                        | > 5 years<br>25     |                      | ≤ 5 years<br>59                                                                                      |                       | > 5 years<br>226      |                 | 0.018    |
| Presence of working staff in the flock                                                           |                        |                     |                      |                                                                                                      |                       |                       |                 |          |
| Yes<br>18                                                                                        |                        | No<br>22            |                      | Yes<br>105                                                                                           |                       | No<br>180             |                 | 0.32     |
